# Supplementary material for: Identification of a novel pegivirus in reindeer (Rangifer tarandus) in northeastern China
Source: Research Square preprint supplement (doi:10.21203/rs.3.rs-6664467/v1), 2025-06-26
Supplement: Supplementary file 1 [file d7934f50ec8367775b8a0d45.docx]

**Supplementary material**


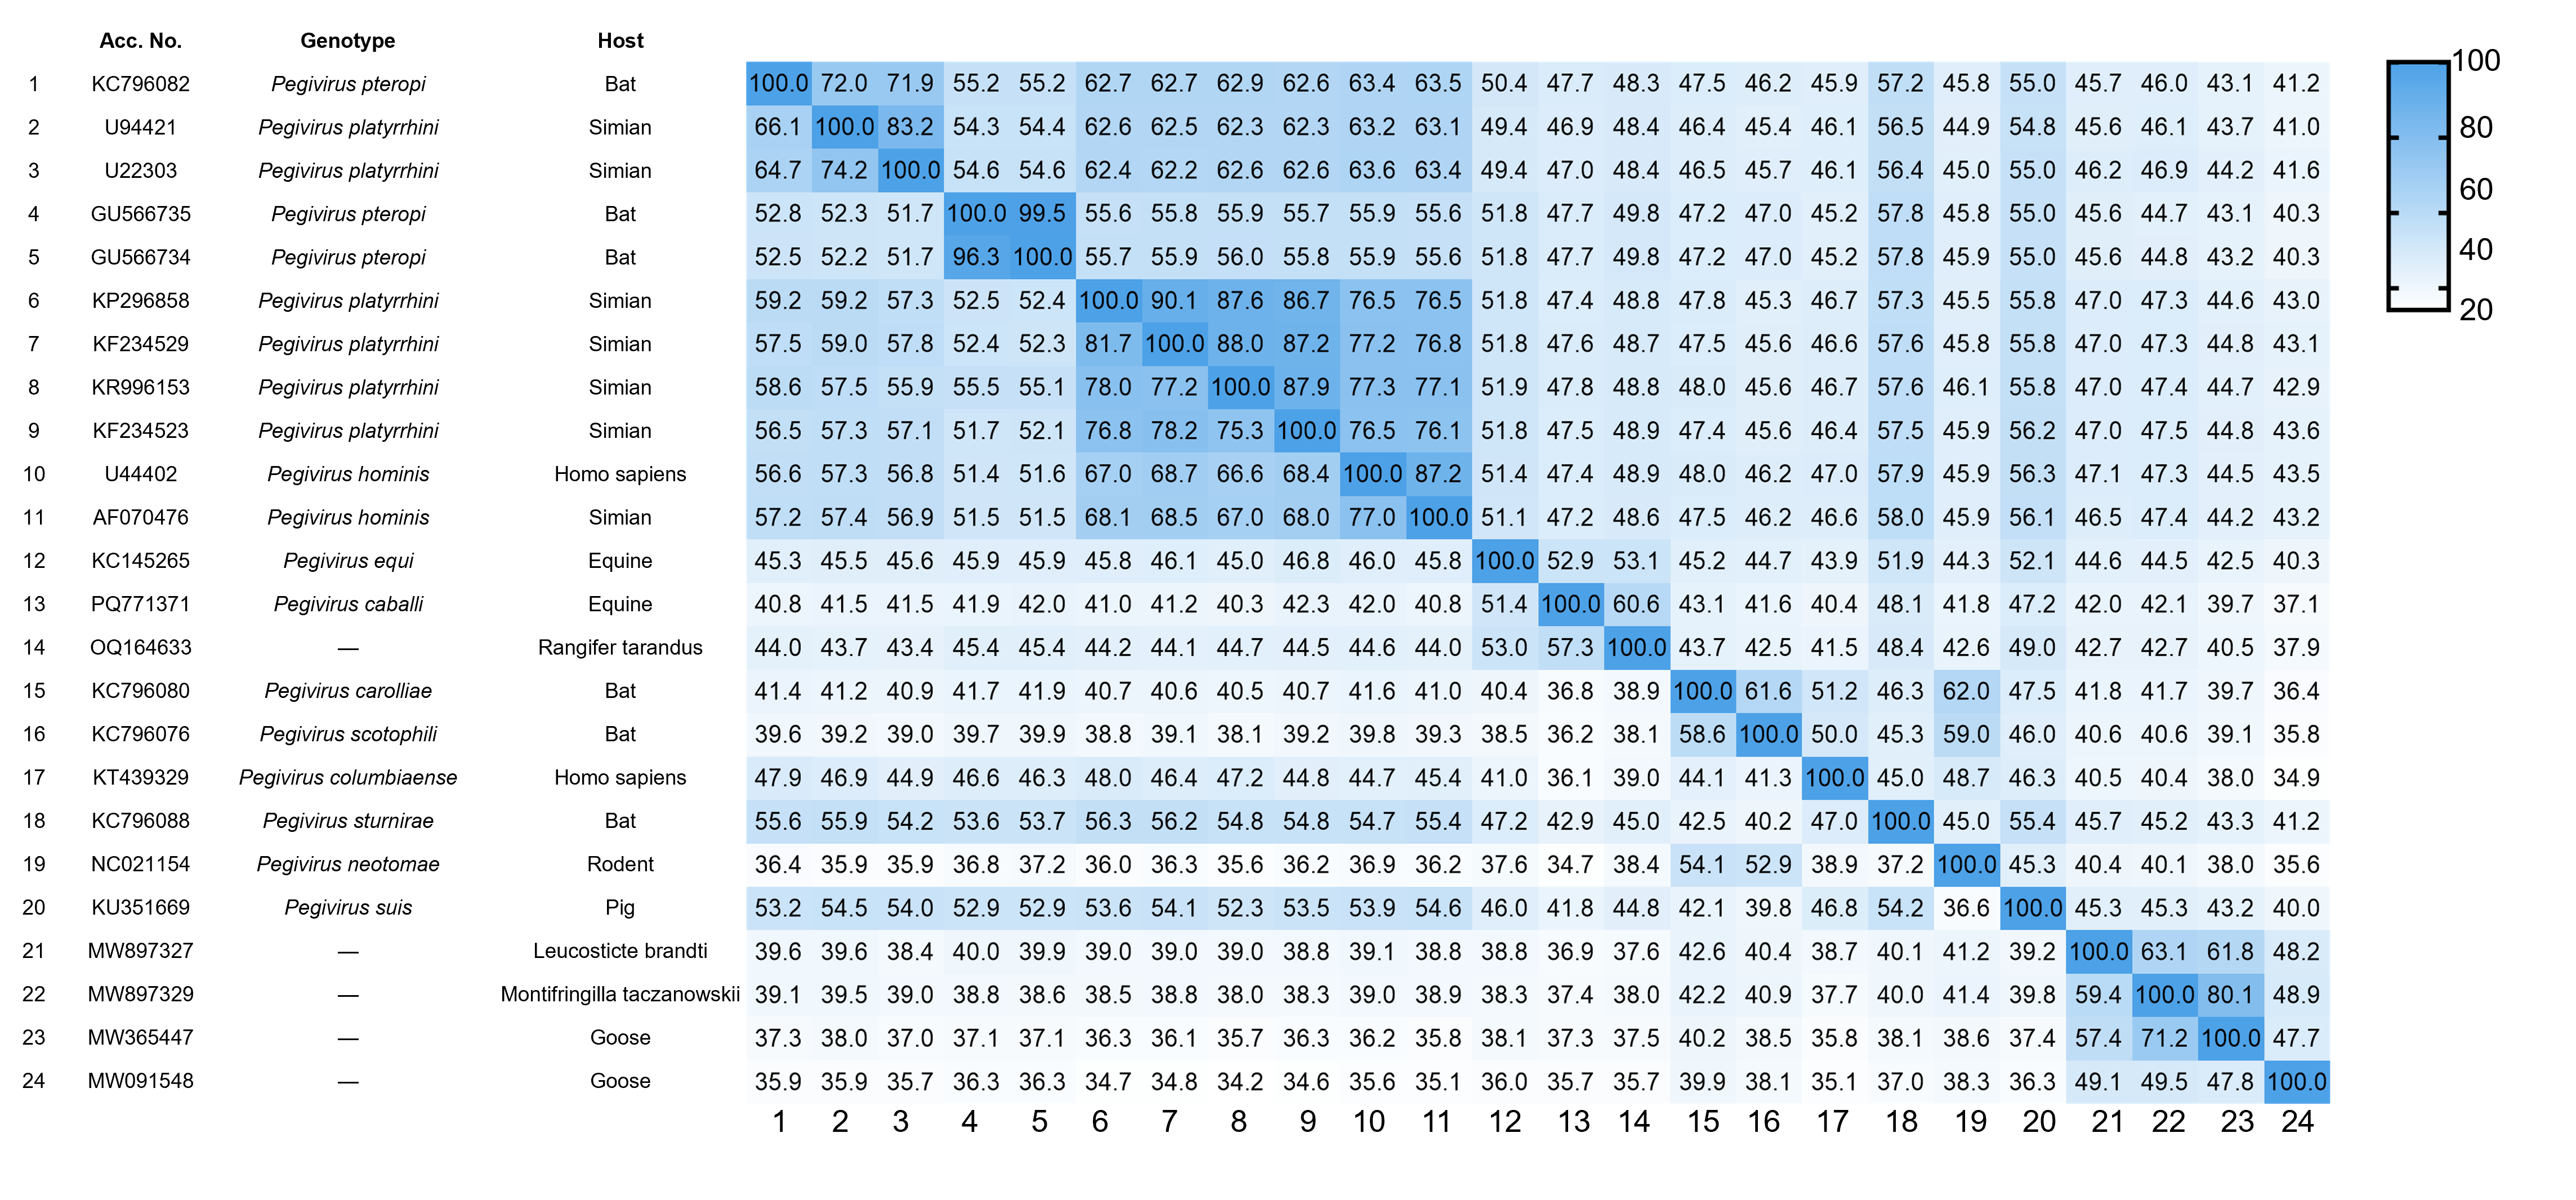


Figure S1. Nucleotide (upper right) and amino acid (lower left) sequence identities of the pegivirus polyprotein gene.

**Table S1.** The reindeer samples collected in this study

| **Sample ID** | **Age (Years)** | **Sex** |
| --- | --- | --- |
|
| 1 | ≥3 | Male |
| 2 | 1 | Male |
| 3 | 1 | Male |
| 4 | 2 | Female |
| 5 | 0.5 | Female |
| 6 | ≥3 | Male |
| 7 | 1 | Male |
| 8 | 2 | Male |
| 9 | 2 | Female |
| 10 | ≥3 | Male |
| 11 | ≥3 | Female |
| 12 | 0.5 | Female |
| 13 | 1 | Female |
| 14 | 2 | Male |
| 15 | 2 | Male |
| 16 | 0.5 | Male |
| 17 | ≥3 | Male |
| 18 | 2 | Female |
| 19 | 2 | Female |
| 20 | 1 | Male |
| 21 | 1 | Female |

**Table S2.** The primers used in this study

| Primer | Position (bp)* | Sequence (5'→3') | Polarity | Amplicon (bp) |
| --- | --- | --- | --- | --- |
| Detection |  |  |  |  |
| RPgV F | 1259 | AATGCCCGTCTACCGTGCCTA | + | 282 |
| RPgV R1 | 1589 | GTGCCCCTCAACCATTGCT | - |
| RPgV R2 | 1541 | ACGGCACAAACCTCGTAACCA | - |
| Race |  |  |  |  |
| 5’-GSP | 916 | GATTACGCCAAGCTTCCGTCAGCCGCAAGGGATAGGTTAGG | - | — |
| 5’-NGSP | 237 | GATTACGCCAAGCTTTAGGGATCGTTACGGTCGTGGC | - | — |
| Genome amplification |  |  |  |  |
| 1 RPgV F | 1 | AATGCCGTTATCCGGGGCT | + | 665 |
| 1 RPgV R1 | 734 | CATGTGAGCGCAAACCTCGT | - |
| 1 RPgV R2 | 666 | GCTTCAGCCCAACAAGTTCCG | - |
| 2 RPgV F1 | 539 | TCCGGCCTCTCCACGAGTGTC | + | 848 |
| 2 RPgV F2 | 612 | GTACTGCACCTCGACCGTGT | + |
| 2 RPgV R | 1460 | CCCGCTCGCAGTCAAAGTTGT | - |
| 3 RPgV F | 1435 | CCAGTGTGCCGCCTTCATCG | + | 805 |
| 3 RPgV R1 | 2262 | CGCCTGCCTCTGAGTAACACTGA | - |
| 3 RPgV R2 | 2240 | TGATGTTGCCAAACGCTAGCC | - |
| 4 RPgV F | 2092 | TACGTGCCCCAGTTGGATGC | + | 784 |
| 4 RPgV R1 | 2922 | ACGTGTCACCGAGCCCGAAC | - |
| 4 RPgV R2 | 2876 | CACCCAGGCCCACCTCGAGT | - |
| 5 RPgV F | 2716 | CGCTCTGTGCTCGGGTATACAGT | + | 850 |
| 5 RPgV R1 | 3633 | CCACCACCTAGGGTTCAAGCCA | - |
| 5 RPgV R2 | 3566 | GGTATACATCACAGGCCCCACGA | - |
| 6 RPgV F | 3500 | ACAAAGCGGAGTACAAGGGGAAT | + | 878 |
| 6 RPgV R1 | 4452 | CCCCTTCAGATGTTAAAGCAACC | - |
| 6 RPgV R2 | 4378 | GCGTACAACACGAGCCGAACACC | - |
| 7 RPgV F | 4329 | CAGTGTCCTTCTGGGCATT | + | 886 |
| 7 RPgV R1 | 5308 | GGCCAGCCCCAACCTCCAA | - |
| 7 RPgV R2 | 5215 | CCGAACCGGCAAATCAGGGG | - |
| 8 RPgV F | 5162 | GGCCTCCTTCGGATGACCCTA | + | 733 |
| 8 RPgV R1 | 6127 | GCTTCCCAACCACCGAGGAC | - |
| 8 RPgV R2 | 5895 | CCCAGGCCGCACATATCAGG | - |
| 9 RPgV F | 5821 | AGTCAATCCCCACTAGGAGTTGC | + | 915 |
| 9 RPgV R1 | 6771 | CCCCTGGCTGGAACCACGA | - |
| 9 RPgV R2 | 6736 | CCCCACGGATCCAGGACGA | - |
| 10 RPgV F | 6545 | ACTACGCCGTGTCCTTCGTGA | + | 787 |
| 10 RPgV R1 | 7432 | GCCCCTCCTTCGTACCCCTG | - |
| 10 RPgV R2 | 7332 | ACCAGACCCGTGACCAATCCG | - |
| 11 RPgV F | 7143 | TTCCGGCGTCCCTAGCACT | + | 762 |
| 11 RPgV R1 | 7991 | CCCACCTCAGCAAGCGTCA | - |
| 11 RPgV R2 | 7905 | TGGGCAGAACCACTCTCCGAC | - |
| 12 RPgV F1 | 7839 | CGCAGTGCTTGGTACCGTTT | + | 924 |
| 12 RPgV F2 | 7877 | GTCGCTCGCCTCCAAGCTCC | + |
| 12 RPgV R | 8801 | CTTCTCCATCATGTCCGCAACGA | - |
| 13 RPgV F | 8756 | CGGCAATCACGGTCTCGGAT | + | 503 |
| 13 RPgV R1 | 9434 | ACCCGTAACCTTTGAGTGCAT | - |
| 13 RPgV R2 | 9259 | GTACACCCCGGATGCACGACA | - |
| 14 RPgV F | 9096 | TGCGTCCGTGTTCGACTCCTC | + | 661 |
| 14 RPgV R1 | 9886 | TACCAGCCCAAGCCTCGCAT | - |
| 14 RPgV R2 | 9757 | ACCCAGCGGAAAAGACAACCT | - |
| 15 RPgV F | 9626 | CCGGTGGCTATACCCTACTCT | + | 591 |
| 15 RPgV R1 | 10277 | GTCGGTCACCACCCTACAGA | - |
| 15 RPgV R2 | 10217 | CCCAGATGAAGACCCCGACGA | - |
| 16 RPgV F1 | 9763 | TCTTTTCCGCTGGGTTTGCTC | + | 544 |
| 16 RPgV F2 | 10062 | GCAGGCACCCTACCAGTCAC | + |
| 16 RPgV R | 10307 | GGTCGCTAGTCCCGTATGATCC | - |

*Primer positions are referenced to the complete sequences obtained by RNA-seq in this study.

**Table S3.** The information about the sequences used in this study

| **Species** | **Acc. No.** | **Strain** | **Length (nt/aa)** | **Sampling Country** | **Sampling date** | **Host species** |
| --- | --- | --- | --- | --- | --- | --- |
| — | OQ164633 | GH01 | 10,368/3,249 | China | Jun 2022 | Rangifer tarandus |
| *Pegivirus pteropi* | KC796082 | PDB-24 | 9,504/3,010 | Cameroon | 2010 | Chaerephon sp. |
| GU566735 | 93 | 9,536/3,101 | Bangladesh | Dec 2007 | Pteropus giganteus |
| GU566734 | 68 | 9,630/3,106 | Bangladesh | Dec 2007 | Pteropus giganteus |
| *Pegivirus platyrrhini* | KP296858 | VGA00020 | 9,146/2,882 | Gambi | 2011 | Chlorocebus sabaeus |
| KF234529 | SPgVkrtg_RT11 | 9,276/2,876 | Uganda | May 2010 | Cercopithecus ascanius |
| KR996153 | myb_M17 | 8,793/2,883 | Tanzania | 1985 | Papio cynocephalus |
| KF234523 | SPgVkrc_RC13 | 9,525/2,898 | Uganda | May 2010 | Piliocolobus tephrosceles |
| U94421 | Alab | 9,550/2,967 | — | — | Saguinus labiatus |
| U22303 | — | 9,653/2,954 | — | — | — |
| *Pegivirus hominis* | U44402 | PNF2161 | 9,392/2,873 | — | — | Homo sapiens |
| AF070476 | — | 9,250/2,942 | — | — | — |
| *Pegivirus equi* | KC145265 | HorseA1_serum | 10,479/3,189 | USA | Aug 2011 | Equus caballus |
| *Pegivirus caballi* | KC410872 | C0035 | 11,197/3,344 | USA | 2011 | Equus sp. |
| *Pegivirus carolliae* | KC796080 | PDB-1698 | 10,465/3,325 | Guatemala | 2010 | Carollia perspicillata |
| *Pegivirus scotophili* | KC796076 | PDB-620 | 10,767/3,469 | Kenya | 2010 | Scotophilus dinganii |
| *Pegivirus columbiaense* | KT439329 | AK-790 | 9,538/3,057 | USA | 2015 | Homo sapiens |
| *Pegivirus sturnirae* | KC796088 | PDB-1715 | 9,777/3,036 | Guatemala | 2010 | Sturnira lilium |
| *Pegivirus neotomae* | NC021154 | CC61 | 11,279/3,484 | USA | 2008 | Neotoma lepida |
| *Pegivirus suis* | KU351669 | PPgV_903/Ger/2013 | 9,760/2,972 | Germany | Aug 2013 | Sus scrofa domestica |
| — | MW897327 | XZN | 10,719/3,282 | China | Apr 2018 | Leucosticte brandti |
| — | MW897329 | YSN | 10,419/3,282 | China | Jul 2019 | Onychostruthus taczanowskii |
| — | MW365447 | FV2 | 11,195/3,406 | China | 2016 | Anser cygnoides |
| — | MW091548 | — | 11,479/3,430 | China | 2016 | Anser cygnoides |
